# Supplementary material for: Revealing reaction intermediates in one-carbon elongation by thiamine diphosphate/CoA-dependent enzyme family
Source: Springer Nature journal article supplement (doi:10.1038/s42004-024-01242-y), 2024-07-21
Supplement: MOESM1 [file 42004_2024_1242_MOESM1_ESM.pdf › 42004_2024_1242_MOESM1_ESM.pdf]

## Supplementary figures

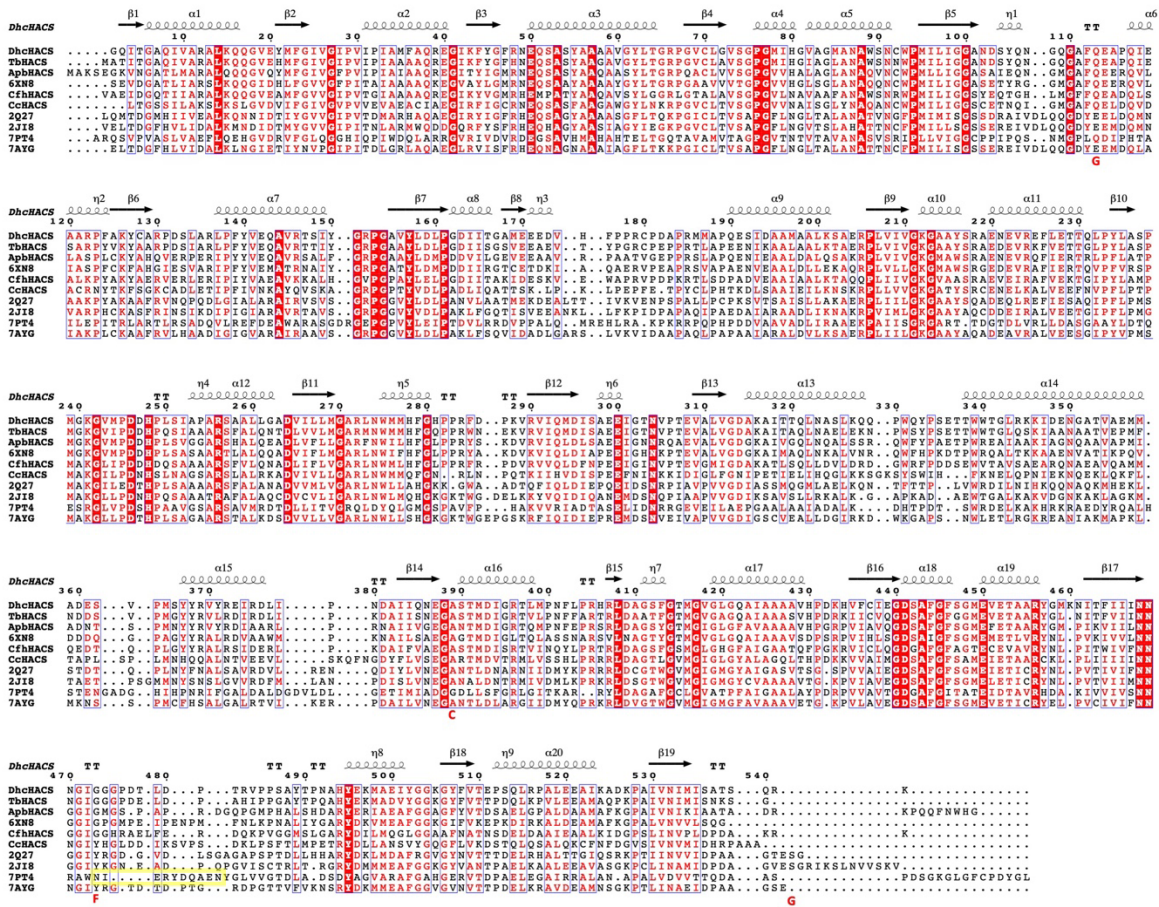

**Supplementary Figure S1.** Sequence alignment of HACL/S including RuHACL/S, OXC and AcHACL/S sub-families. Y497F, S568G, E135G, and A415C mutations from MeOXC (PDB id: 7ayg) to MeOXC4 (PDB id: 7b2e)<sup>1</sup> are indicated in red just below 7ayg sequence. Yellow box indicates the  $\alpha$ -helix in AcHACL/S (PDB id: 7pt4) distinct from other enzymes.

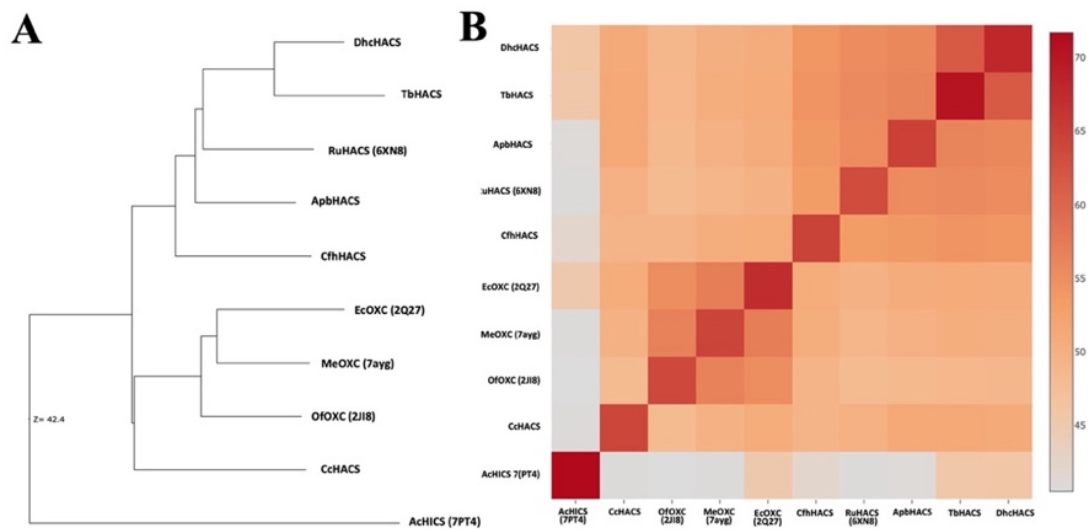

**Supplementary Figure S2.** Structural similarity tree (A) and dendrogram (B). The dendrogram is derived by average linkage clustering of the structural similarity matrix (Dali Z-scores)<sup>2</sup>.

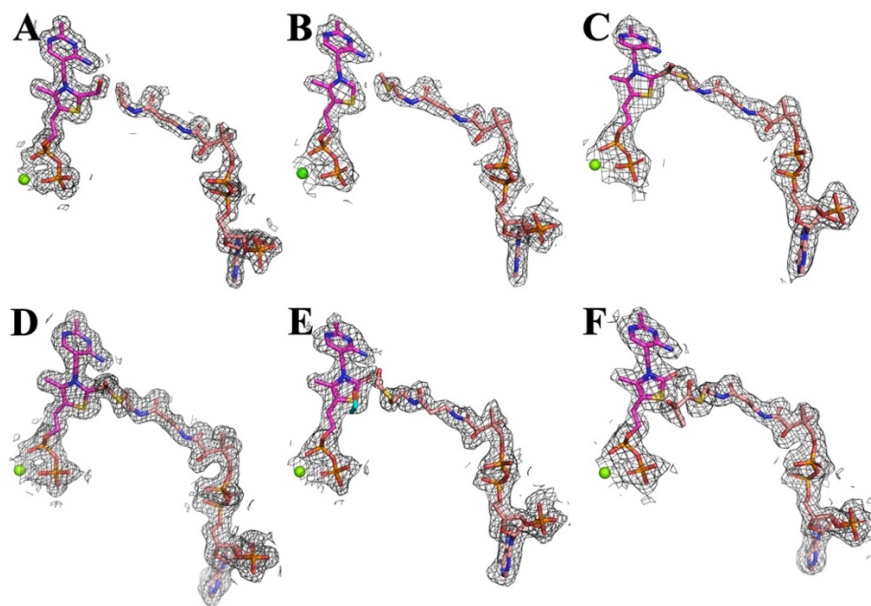

**Supplementary Figure S3.** Electron density for ThDP and acyl-CoA molecules found in the TbHACL/S-fCoA (A), TbHACL/S-hCoA (B), ApbHACL/S-CoA (C), ApbHACL/S-fCoA (D), ApbHACL/S-L-ICoA (E), and ApbHACL/S-D-ICoA (F) complexes. Magnesium ion is shown as green sphere. The electron density (composite annealed map, 2DFo-mFc) for the ligands is contoured at 1.0  $\sigma$  level.

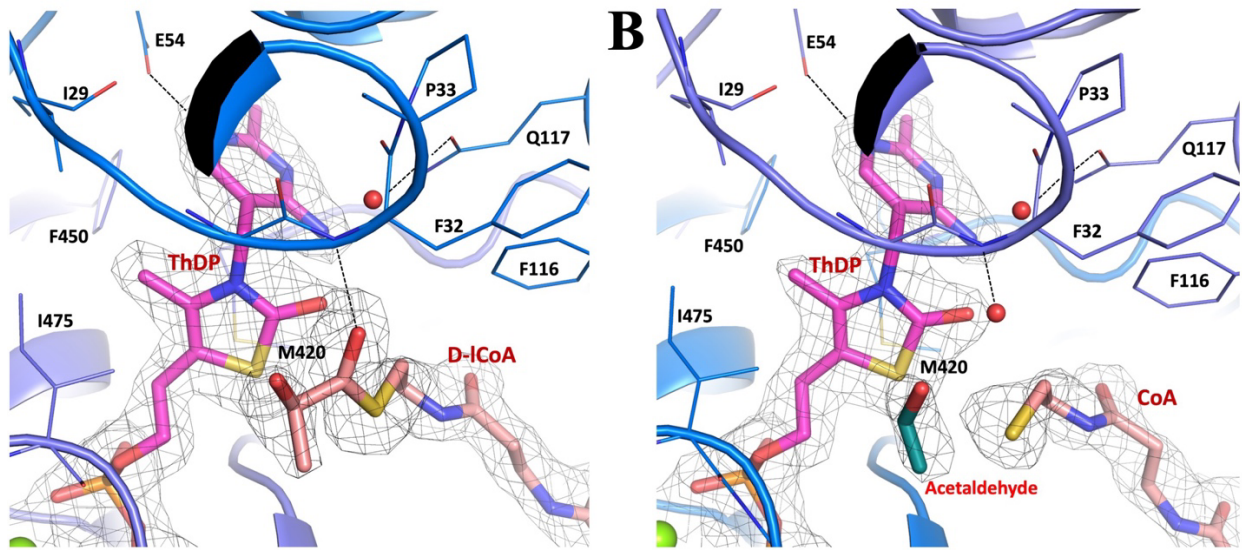

**Supplementary Figure S4.** Active sites of ApbHACL/S-D-lCoA contain two different species of acyl-CoA, D-lCoA (A) and hydrolyzed to acyl-CoA plus acetaldehyde (B). ThDP and acyl-CoA molecules shown in magenta and orange sticks, respectively and acetaldehyde in dark green. The electron density (composite annealed map, 2DFo-mFc) for the ligands is contoured at 1.0  $\sigma$  level.

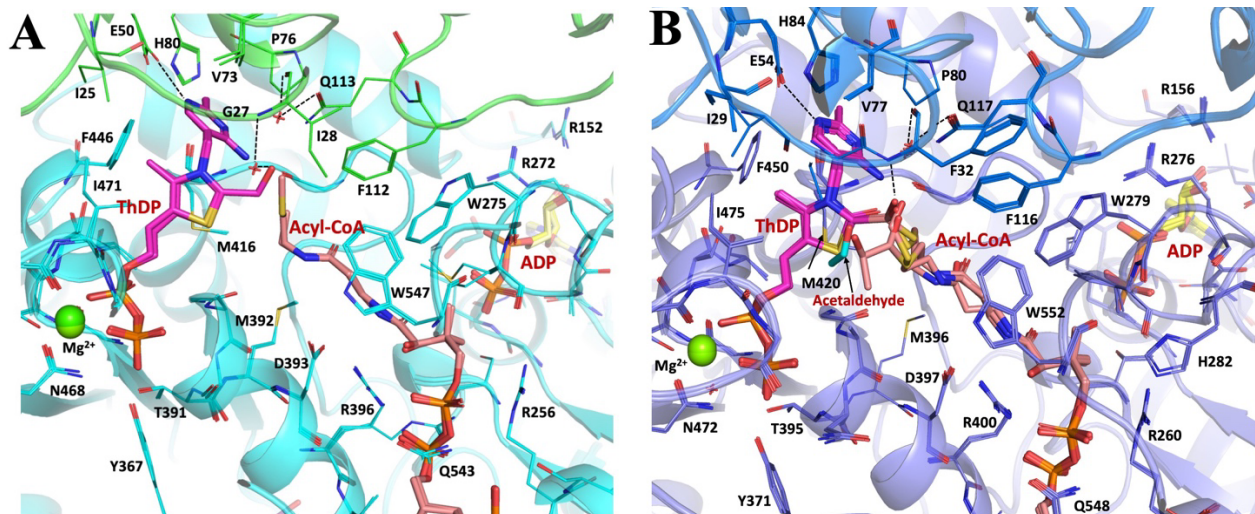

**Supplementary Figure S5.** Structure of active sites of TbHACL/S complex (A) and ApbHACL/S complex (B) showing interaction of enzymes with ThDP and acyl-CoAs. TbHACL/S in cyan and green cartoon drawing, ApbHACL/S in fade blue and dark blue, ThDP in magenta sticks and acyl-CoAs in orange.

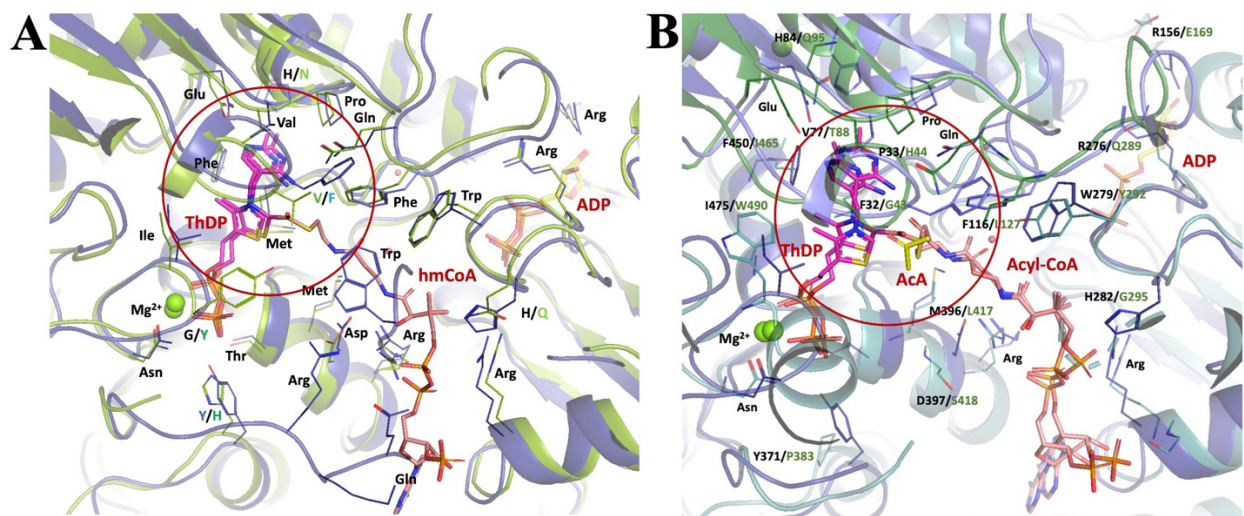

**Supplementary Figure S6.** Differences between active sites in enzymes (A) CcHACL/S (light green) and ApbHACL/S (dark blue) and (B) ApbHACL/S (dark blue) and AchHACL/S (pale green). Active sites in circles. ThDP in magenta sticks and acyl-CoAs in orange sticks.

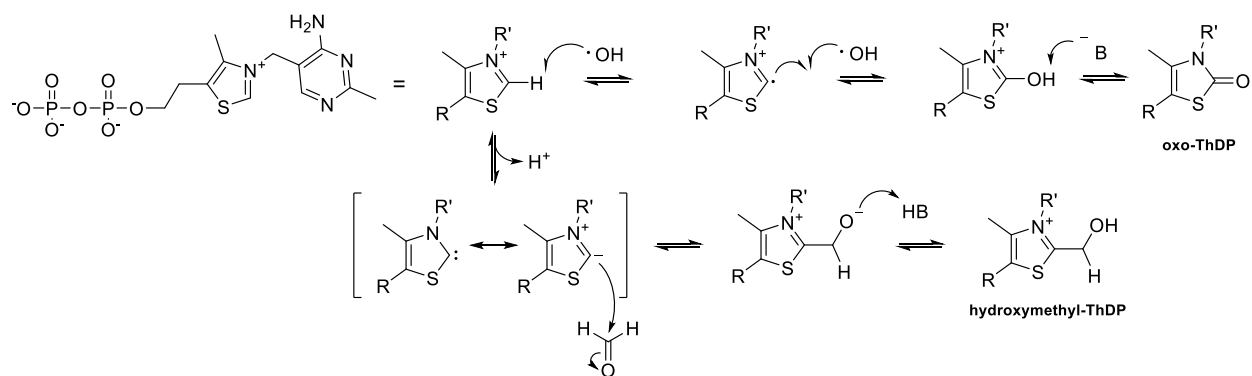

**Supplementary Figure S7.** Possible mechanisms for generation of “oxo-ThDP” and “hydroxymethyl-ThDP” via a ROS mechanism (an example is provided with hydroxyl radical) or an attack of formaldehyde, respectively.

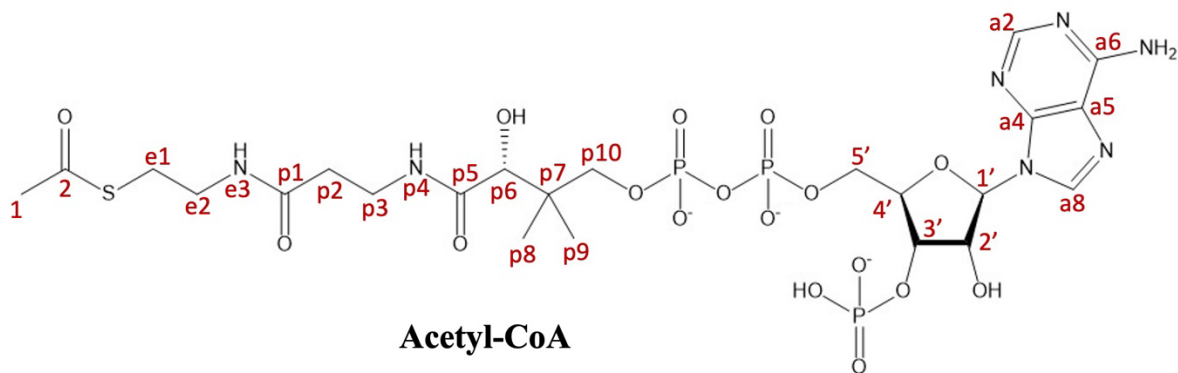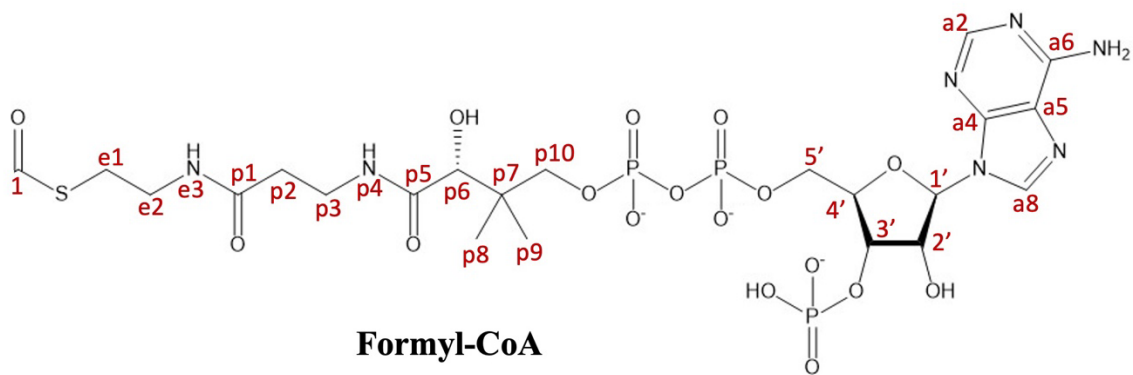

**Supplementary Figure S8.** Carbon atom numbering schemes for acetyl-CoA and formyl-CoA

## Supplementary tables

**Supplementary Table S1.** Crystal data and refinement statistics

|                                             | <i>DhcHACL/S</i>                                          | <i>CcHACL/S</i>                                          | <i>TbHACL/S</i>                                       | <i>CfhHACL/S</i>                                                                 |
|---------------------------------------------|-----------------------------------------------------------|----------------------------------------------------------|-------------------------------------------------------|----------------------------------------------------------------------------------|
| <i>Data Collection</i>                      | 19-ID SBC                                                 | 19-ID SBC                                                | 19-ID SBC                                             | 19-ID SBC                                                                        |
| <i>Space group</i>                          | <i>C</i> 2                                                | <i>P</i> 2 <sub>1</sub>                                  | <i>P</i> 2 <sub>1</sub> 2 <sub>1</sub> 2 <sub>1</sub> | <i>P</i> 3 <sub>1</sub> 2 <sub>1</sub>                                           |
| <i>Cell dimensions</i>                      |                                                           |                                                          |                                                       |                                                                                  |
| <i>a, b, c (Å)</i>                          | 324.22, 77.84, 229.55, $\alpha=\gamma=90$ , $\beta=134.5$ | 64.74, 179.29, 96.83, $\alpha=\gamma=90$ , $\beta=108.2$ | 120.59, 134.01, 173.39, $\alpha=\beta=\gamma=90$      | <i>a</i> = <i>b</i> = 111.33, <i>c</i> =193.16, $\alpha=\beta=90$ , $\gamma=120$ |
| <i>Resolution range (Å)<sup>a</sup></i>     | 2.70-50.00 (2.70-2.75)                                    | 1.85-50.00 (1.85-1.88)                                   | 2.25-50.00 (2.25-2.29)                                | 2.65-50.00 (2.65-2.70)                                                           |
| <i>Unique reflections<sup>a</sup></i>       | 112,373 (5,449)                                           | 167,273 (6,685)                                          | 133,571 (6,589)                                       | 39,660 (1,349)                                                                   |
| <i>R-merge<sup>b</sup></i>                  | 0.175 (1.686)                                             | 0.107 (0.818)                                            | 0.159 (1.196)                                         | 0.162 (0.913)                                                                    |
| <i>Mean I/<math>\sigma</math>(I)</i>        | 10.1 (1.1)                                                | 14.7 (1.3)                                               | 10.3 (1.6)                                            | 13.0 (1.0)                                                                       |
| <i>CC<sub>1/2</sub><sup>c</sup></i>         | 0.996 (0.423)                                             | 0.996 (0.791)                                            | 0.983 (0.659)                                         | 1.0 (0.837)                                                                      |
| <i>Completeness (%)</i>                     | 99.7 (97.8)                                               | 94.1 (76.1)                                              | 99.9 (100)                                            | 97.1 (68.4)                                                                      |
| <i>Redundancy</i>                           | 8.5 (7.0)                                                 | 7.8 (5.8)                                                | 5.2 (5.0)                                             | 14.2 (8.7)                                                                       |
| <i>Wilson B-factor (Å<sup>2</sup>)</i>      | 66.0                                                      | 22.4                                                     | 27.6                                                  | 59.2                                                                             |
| <b><i>Refinement</i></b>                    |                                                           |                                                          |                                                       |                                                                                  |
| <i>Resolution range (Å)</i>                 | 2.70-40.53 (2.70-2.73)                                    | 1.85-44.82 (1.85-1.87)                                   | 2.25-43.39 (2.25-2.27)                                | 2.65-48.23 (2.65-2.72)                                                           |
| <i>Reflections work/test</i>                | 106,761/5,492                                             | 158,800/8,345                                            | 126,194/6,707                                         | 37,562/1,913                                                                     |
| <i>R<sub>work</sub>/R<sub>free</sub></i>    | 0.194/0.235                                               | 0.156/0.196                                              | 0.160/0.195                                           | 0.208/0.244                                                                      |
| <i>Number atoms</i>                         | 33287                                                     | 18514                                                    | 17416                                                 | 8326                                                                             |
| <i>Protein</i>                              | 32822                                                     | 16813                                                    | 16299                                                 | 8195                                                                             |
| <i>Ligand/ion</i>                           | 460                                                       | 298                                                      | 297                                                   | 127                                                                              |
| <i>Water</i>                                | 5                                                         | 1403                                                     | 820                                                   | 4                                                                                |
| <i>Protein residues</i>                     | 4317                                                      | 2234                                                     | 2175                                                  | 1092                                                                             |
| <i>RMSD (bonds) (Å)</i>                     | 0.002                                                     | 0.006                                                    | 0.004                                                 | 0.002                                                                            |
| <i>RMSD (angles) (°)</i>                    | 0.513                                                     | 0.876                                                    | 0.690                                                 | 0.481                                                                            |
| <i>Ramachandran favored<sup>c</sup> (%)</i> | 96.96                                                     | 97.72                                                    | 98.23                                                 | 97.22                                                                            |
| <i>allowed (%)</i>                          | 3.01                                                      | 2.19                                                     | 1.77                                                  | 2.59                                                                             |
| <i>outliers (%)</i>                         | 0.02                                                      | 0.09                                                     | 0.0                                                   | 0.19                                                                             |

|                                         |      |      |      |      |
|-----------------------------------------|------|------|------|------|
| <i>Rotamer outliers (%)<sup>d</sup></i> | 1.81 | 0.87 | 0.72 | 2.67 |
| <i>Clashscore</i>                       | 4.73 | 2.64 | 1.64 | 3.25 |
| <i>Average B-factor (Å<sup>2</sup>)</i> | 77.2 | 29.7 | 32.5 | 69.6 |
| <i>Protein</i>                          | 77.3 | 29.6 | 32.5 | 69.8 |
| <i>Ligand/ion</i>                       | 66.3 | 26.5 | 32.0 | 62.3 |
| <i>Water</i>                            | 74.2 | 33.6 | 33.0 | 54.6 |
| <i>Number of TLS groups</i>             | 53   | 31   | 23   | 12   |
| <i>PDB ID</i>                           | 8vzj | 8vzi | 8vzh | 8vzk |

|                                          | <i>TbHACL/S-fCoA</i>    | <i>TbHACL/S-hCoA</i>    | <i>ApbHACL/S-CoA</i>                          | <i>ApbHACL/S-fCoA</i>         | <i>ApbHACL/S-L-lCoA</i>       | <i>ApbHACL/S-D-lCoA</i>                       |
|------------------------------------------|-------------------------|-------------------------|-----------------------------------------------|-------------------------------|-------------------------------|-----------------------------------------------|
| <i>Data Collection</i>                   | 23-IDB GMCA             | 19-ID SBC               | 19-ID SBC                                     | 19-ID SBC                     | 19-ID SBC                     | 23-IDB GMCA                                   |
| <i>Space group</i>                       | C222 <sub>1</sub>       | C222 <sub>1</sub>       | P2 <sub>1</sub> 2 <sub>1</sub> 2 <sub>1</sub> | P1                            | P1                            | P2 <sub>1</sub> 2 <sub>1</sub> 2 <sub>1</sub> |
| <i>Cell dimensions</i>                   |                         |                         |                                               |                               |                               |                                               |
| <i>a, b, c (Å)</i> ,                     | 100.17, 182.51, 123.92, | 100.62, 182.77, 123.84, | 69.80, 178.13, 196.48,                        | 69.08, 102.44, 103.98, 113.8, | 69.41, 102.68, 104.34, 114.1, | 69.71, 178.00, 196.11,                        |
| <i>α, β, γ (°)</i>                       | α=β=γ=90                | α=β=γ=90                | α=β=γ=90                                      | 96.8, 105.5                   | 96.7, 105.2                   | α=β=γ=90                                      |
| <i>Resolution range (Å)<sup>a</sup></i>  | 2.20-50.00 (2.20-2.24)  | 1.70-50.00 (1.70-1.73)  | 2.36-50.00 (2.36-2.39)                        | 1.72-50.00 (1.72-1.76)        | 2.05-50.00 (2.05-2.09)        | 1.98-50.00 (1.98-2.08)                        |
| <i>Unique reflections<sup>a</sup></i>    | 56,818 (2,390)          | 123,996 (5,095)         | 99,068 (4,335)                                | 23,8150 (1,487)               | 144,733 (5,583)               | 165,964 (20,426)                              |
| <i>R-merge<sup>b</sup></i>               | 0.233 (0.678)           | 0.188 (0.850)           | 0.263 (1.126)                                 | 0.052 (0.338)                 | 0.189 (0.671)                 | 0.275 (2.039)                                 |
| <i>Mean I/σ(I)</i>                       | 6.8 (1.0)               | 14.0 (1.2)              | 6.2 (1.1)                                     | 7.2 (1.6)                     | 7.9 (1.4)                     | 7.8 (0.9)                                     |
| <i>CC<sub>1/2</sub><sup>c</sup></i>      | 0.977 (0.576)           | 0.984 (0.506)           | 0.960 (0.548)                                 | 0.996 (0.806)                 | 0.928 (0.490)                 | 0.995 (0.435)                                 |
| <i>Completeness (%)</i>                  | 98.1 (83.7)             | 98.3 (81.4)             | 97.2 (85.6)                                   | 92.3 (59.9)                   | 94.9 (73.2)                   | 97.3 (83.9)                                   |
| <i>Redundancy</i>                        | 8.2 (3.0)               | 8.0 (3.8)               | 5.8 (4.9)                                     | 2.7 (2.6)                     | 3.5 (2.7)                     | 12.0 (7.2)                                    |
| <i>Wilson B-factor (Å<sup>2</sup>)</i>   | 21.6                    | 14.9                    | 32.7                                          | 18.4                          | 25.4                          | 25.7                                          |
| <b>Refinement</b>                        |                         |                         |                                               |                               |                               |                                               |
| <i>Resolution range (Å)</i>              | 2.20-37.41 (2.20-2.24)  | 1.70-48.04 (1.70-1.71)  | 47.35-2.36 (2.36-2.38)                        | 1.72-38.63 (1.72-1.74)        | 2.05-49.52 (2.05-2.08)        | 1.98-47.27 (1.98-2.00)                        |
| <i>Reflections work/test</i>             | 53,986/2,797            | 117,122/6,044           | 93,957/4,893                                  | 226,339/11,600                | 137,400/7,055                 | 156,814/8,175                                 |
| <i>R<sub>work</sub>/R<sub>free</sub></i> | 0.198/0.234             | 0.145/0.175             | 0.208/0.246                                   | 0.160/0.199                   | 0.209/0.243                   | 0.182/0.219                                   |
| <i>Number atoms</i>                      | 9071                    | 9574                    | 17547                                         | 18812                         | 17923                         | 18742                                         |
| <i>Protein</i>                           | 8313                    | 8463                    | 16756                                         | 16734                         | 16695                         | 16745                                         |
| <i>Ligand/ion</i>                        | 245                     | 173                     | 454                                           | 344                           | 438                           | 514                                           |

|                                             |       |       |       |       |       |       |
|---------------------------------------------|-------|-------|-------|-------|-------|-------|
| <i>Water</i>                                | 513   | 938   | 337   | 2078  | 790   | 1483  |
| <i>Protein residues</i>                     | 1103  | 1135  | 2226  | 2228  | 2219  | 2227  |
| <i>RMSD (bonds) (Å)</i>                     | 0.002 | 0.011 | 0.002 | 0.008 | 0.002 | 0.002 |
| <i>RMSD (angles) (°)</i>                    | 0.561 | 1.138 | 0.696 | 1.048 | 0.666 | 0.692 |
| <i>Ramachandran favored<sup>c</sup> (%)</i> | 97.81 | 98.44 | 97.25 | 98.05 | 97.73 | 97.69 |
| <i>allowed (%)</i>                          | 2.19  | 1.56  | 2.75  | 1.95  | 2.23  | 2.31  |
| <i>outliers (%)</i>                         | 0.00  | 0.00  | 0.0   | 0.00  | 0.05  | 0.00  |
| <i>Rotamer outliers (%)<sup>d</sup></i>     | 1.53  | 0.82  | 1.08  | 0.84  | 0.85  | 0.60  |
| <i>Clashscore</i>                           | 2.01  | 1.06  | 2.62  | 1.21  | 2.07  | 1.35  |
| <i>Average B-factor (Å<sup>2</sup>)</i>     | 23.3  | 17.5  | 36.2  | 22.7  | 25.1  | 26.6  |
| <i>Protein</i>                              | 23.3  | 16.6  | 36.2  | 21.7  | 25.1  | 26.2  |
| <i>Ligand/ion</i>                           | 23.6  | 20.0  | 39.3  | 26.6  | 24.1  | 30.7  |
| <i>Water</i>                                | 23.4  | 25.7  | 32.3  | 30.5  | 26.7  | 30.4  |
| <i>Number of TLS groups</i>                 | 13    | 10    | 24    | 23    | 27    | 30    |
| <i>PDB ID</i>                               | 8vzd  | 8vze  | 8vzf  | 8vzc  | 8vza  | 8vzb  |

<sup>a</sup> Values in parentheses correspond to the highest resolution shell.

<sup>b</sup>  $R_{\text{merge}} = \frac{\sum_h \sum_j |I_{hj} - \langle I_h \rangle|}{\sum_h \sum_j I_{hj}}$ , where  $I_{hj}$  is the intensity of observation  $j$  of reflection  $h$ .

<sup>c</sup> As defined by Karplus and Diederichs<sup>3</sup>.

<sup>d</sup> As defined by Molprobity<sup>4</sup>.



## Supplementary Table S2: Pairwise Comparisons of RMSD and sequence identity.

The numbers are shown in the following order: pairwise sequence identities (%), RMSDs of /540 superimposed C $\alpha$  atom positions of active site residues/residues binding to ThDP, ADP, or acyl-CoA/residues binding to ThDP or acyl-CoA/residues binding to ThDP. The residues in active sites, binding to ThDP and ADP and used for calculations are listed in Supplementary Table S3.

| Name            | CcHACL/S                       | TbHACL/S                       | CfhHACL/S                      | ApbHACL/S                      | RuHACL/S                       | OfOXC (2ji8)                   | EcOXC (2q27)                   | MeOXC (7ayg)                   | AcHICL/S (7pt4)                |
|-----------------|--------------------------------|--------------------------------|--------------------------------|--------------------------------|--------------------------------|--------------------------------|--------------------------------|--------------------------------|--------------------------------|
| DhcHACL/S       | 43.2/1.33<br>0.56/0.55<br>0.51 | 79.0/0.47<br>0.23/0.29<br>0.28 | 51.5/1.00<br>0.54/0.51<br>0.52 | 61.7/0.74<br>0.35/0.42<br>0.40 | 53.7/0.87<br>0.48/0.40<br>0.37 | 40.4/1.57<br>0.60/0.62<br>0.63 | 41.8/1.23<br>0.65/0.62<br>0.66 | 41.4/1.31<br>0.74/0.69<br>0.75 | 25.5/1.92<br>1.49/1.45<br>1.47 |
| CcHACL/S        |                                | 41.7/1.28<br>0.62/0.49<br>0.44 | 39.0/1.53<br>0.80/0.61<br>0.58 | 42.2/1.25<br>0.57/0.55<br>0.49 | 40.4/1.25<br>0.63/0.56<br>0.49 | 40.2/1.55<br>0.57/0.72<br>0.72 | 41.9/1.36<br>0.56/0.58<br>0.55 | 37.8/1.48<br>0.58/0.80<br>0.79 | 23.5/1.71<br>1.37/1.35<br>1.38 |
| TbHACL/S        |                                |                                | 52.5/0.99<br>0.54/0.44<br>0.44 | 60.7/0.70<br>0.36/0.29<br>0.29 | 55.3/0.78<br>0.45/0.28<br>0.25 | 40.0/1.60<br>0.67/0.67<br>0.67 | 41.1/1.24<br>0.70/0.55<br>0.55 | 41.2/1.35<br>0.76/0.78<br>0.76 | 24.5/1.92<br>1.52/1.35<br>1.36 |
| CfhHACL/S       |                                |                                |                                | 51.1/0.99<br>0.58/0.52<br>0.53 | 47.9/1.23<br>0.67/0.41<br>0.35 | 38.1/1.44<br>0.83/0.78<br>0.79 | 42.5/1.33<br>0.84/0.73<br>0.74 | 39.8/1.38<br>0.92/0.90<br>0.90 | 29.6/1.85<br>1.46/1.35<br>1.34 |
| ApbHACL/S       |                                |                                |                                |                                | 62.1/0.73<br>0.49/0.39<br>0.37 | 37.7/1.49<br>0.65/0.69<br>0.69 | 39.6/1.24<br>0.65/0.59<br>0.59 | 39.8/1.40<br>0.73/0.79<br>0.77 | 29.6/1.82<br>1.49/1.41<br>1.40 |
| RuHACL/S (6xn8) |                                |                                |                                |                                |                                | 38.6/1.53<br>0.71/0.77<br>0.75 | 41.2/1.33<br>0.78/0.67<br>0.67 | 39.1/1.51<br>0.85/0.88<br>0.85 | 27.3/1.76<br>1.49/1.46<br>1.45 |
| OfOXC (2ji8)    |                                |                                |                                |                                |                                |                                | 55.7/0.82<br>0.43/0.42<br>0.43 | 62.0/0.79<br>0.35/0.38<br>0.37 | 22.9/1.85<br>1.32/1.27<br>1.29 |
| EcOXC (2q27)    |                                |                                |                                |                                |                                |                                |                                | 61.3/0.74<br>0.43/0.43<br>0.42 | 24.6/1.85<br>1.26/1.13<br>1.14 |
| MeOXC (7ayg)    |                                |                                |                                |                                |                                |                                |                                |                                | 26.2/1.88<br>1.27/1.15<br>1.17 |

**Supplementary Table S3: Residues involved in interacting with ThDP, acyl-CoA, and ADP**

| Name          | Catalytic site-ThDP                   | Pyrophosphate-ThDP                             | Acyl-CoA    | ADP                                            |
|---------------|---------------------------------------|------------------------------------------------|-------------|------------------------------------------------|
| DhcHACS       | G27-P29, E50, F112, Q113, G414, M416, | A389-T391, Y367, I472-G473, D441-A443, N469,   | R256, R396, | R152, R272, K212, D295-I296, S237, A315,       |
| CcHACS        | G29-P31, E52, F114, Q115, G416, M418, | A391-T393, H365, I473-Y474, D443-A445, N470),  | R256, R398, | R154, R272, K212, D293-I294, T237, I313,       |
| TbHACS        | G27-P29, E50, F112, Q113, G414, M416, | A389-T391, Y367, I471-G472, D441-A443, (N468   | R256, R396, | R152, R272, K212, D295-I296, S237), A315,      |
| CfhHACS       | G34-P36, E57, F119, Q120, G421, M423, | A396-T398, Y374, I478-G479, D448-A450, N475    | R263, R403, | V159, R279, K219, D302-F303, M244, A322,       |
| ApbHASL       | G31-P33, E54, F116, Q117, G418, M420, | A393-T395, I475-G476; Y371, D445-A447, N472),  | R260, R400, | R156, R276, K216, D299-L300, T241, G319,       |
| RuHACS (6xn8) | G27-P29, E50, F112, Q113, G414, M416, | A389-T391, Y367, I471-G472; D441-A443, N468),  | R272, L396, | R152, R256, K212, D295-I296, S237, G315,       |
| OfOXC (2ji8)  | G33-P35, E56, Y120, E121, G426, M428, | A401-A403, Y377, I482-Y483; D452-A454, N479),  | R282, R408, | R160, R266, K222, D306-I307, M247, I326,       |
| AcHICS (7pt4) | G42-H44, E65, L127, Q128, G433, L435, | G410- L412, P383, W490-N491, D460-A462, N487), | R273, R417, | E169, R288, Q289, R230, D311-D312, T254, P331, |
| EcHACS (2q27) | G31-P33, E54, Y118, E119, M421, M423  | A396-T398, Y372, I477-Y478, D447-A449, N470),  | R264, R403, | R158, R280, K220, D302-I303, M245, I322,       |

Residues highlighted in green are from the second subunit (protomer)

**Supplementary Table S4.** Kinetic parameters of HAACL/S variants determined for HAACL/S selected for structural analysis.

| <b>Substrate</b>       | <b><math>k_{cat,app}</math> (<math>s^{-1}</math>)</b> | <b><math>K_{m,app}</math> (mM)</b> | <b><math>k_{cat,app}/K_{m,app}</math> (<math>mM^{-1} s^{-1}</math>)</b> |
|------------------------|-------------------------------------------------------|------------------------------------|-------------------------------------------------------------------------|
| <b>RuHAACL/S</b>       |                                                       |                                    |                                                                         |
| <b>Formaldehyde</b>    | $3.72 \pm 0.66$                                       | $7.40 \pm 0.97$                    | $5.03 \times 10^2$                                                      |
| <b>Acetaldehyde</b>    | $3.63 \pm 0.58$                                       | $4.11 \pm 0.41$                    | $8.82 \times 10^2$                                                      |
| <b>Propionaldehyde</b> | $3.36 \pm 0.17$                                       | $17.17 \pm 1.11$                   | $1.96 \times 10^2$                                                      |
| <b>ApbHAACL/S</b>      |                                                       |                                    |                                                                         |
| <b>Formaldehyde</b>    | $11.27 \pm 0.31$                                      | $2.028 \pm 0.34$                   | $5.56 \times 10^3$                                                      |
| <b>Acetaldehyde</b>    | $34.89 \pm 2.30$                                      | $0.41 \pm 0.06$                    | $8.51 \times 10^4$                                                      |
| <b>Propionaldehyde</b> | $10.17 \pm 1.09$                                      | $1.65 \pm 0.12$                    | $6.17 \times 10^3$                                                      |
| <b>DhcHAACL/S</b>      |                                                       |                                    |                                                                         |
| <b>Formaldehyde</b>    | $12.27 \pm 1.11$                                      | $2.12 \pm 0.37$                    | $5.79 \times 10^3$                                                      |
| <b>Acetaldehyde</b>    | $41.35 \pm 4.00$                                      | $0.97 \pm 0.10$                    | $4.26 \times 10^4$                                                      |
| <b>Propionaldehyde</b> | $20.58 \pm 1.88$                                      | $1.071 \pm 0.10$                   | $1.92 \times 10^4$                                                      |
| <b>CcHAACL/S</b>       |                                                       |                                    |                                                                         |
| <b>Formaldehyde</b>    | N.D                                                   | N.D.                               | N.D.                                                                    |
| <b>Acetaldehyde</b>    | $26.71 \pm 4.23$                                      | $4.76 \pm 0.58$                    | $5.61 \times 10^3$                                                      |
| <b>Propionaldehyde</b> | $31.65 \pm 2.46$                                      | $3.497 \pm 0.33$                   | $9.05 \times 10^3$                                                      |
| <b>TbHAACL/S</b>       |                                                       |                                    |                                                                         |
| <b>Formaldehyde</b>    | $9.681 \pm 0.31$                                      | $3.73 \pm 0.12$                    | $2.60 \times 10^3$                                                      |
| <b>Acetaldehyde</b>    | $28.63 \pm 3.70$                                      | $2.94 \pm 0.49$                    | $9.73 \times 10^3$                                                      |
| <b>Propionaldehyde</b> | $24.91 \pm 2.55$                                      | $2.21 \pm 0.31$                    | $1.13 \times 10^4$                                                      |
| <b>CoHAACL/S</b>       |                                                       |                                    |                                                                         |

|                        |              |             |                        |
|------------------------|--------------|-------------|------------------------|
| <b>Formaldehyde</b>    | 10.63 ± 1.47 | 9.47 ± 1.62 | 1.12 x 10 <sup>3</sup> |
| <b>Acetaldehyde</b>    | 58.43 ± 9.11 | 3.80 ± 0.29 | 1.53 x 10 <sup>4</sup> |
| <b>Propionaldehyde</b> | 13.08 ± 1.89 | 1.37 ± 0.22 | 9.57 x 10 <sup>2</sup> |
| <b>CfhHACL/S</b>       |              |             |                        |
| <b>Formaldehyde</b>    | 16.60 ± 1.60 | 2.47 ± 0.33 | 6.73 x 10 <sup>3</sup> |
| <b>Acetaldehyde</b>    | 59.23 ± 5.47 | 8.83 ± 1.09 | 6.70 x 10 <sup>3</sup> |
| <b>Propionaldehyde</b> | 5.69 ± 0.63  | 3.61 ± 0.42 | 1.58 x 10 <sup>3</sup> |

**Supplementary Table S5.** Kinetic parameters of ApbHACL/S on acetaldehyde with and without 0.5 mM ADP. While apparent  $k_{\text{cat}}$  and catalytic efficiency ( $k_{\text{cat}}/K_{\text{M}}$ ) are slightly higher with ADP, the differences are not statistically significant ( $p = 0.55$ ).

| <b>Substrate</b>    | <b>ADP (mM)</b> | <b><math>k_{\text{cat,app}}</math> (s<sup>-1</sup>)</b> | <b><math>K_{\text{m,app}}</math> (mM)</b> | <b><math>k_{\text{cat,app}}/K_{\text{m,app}}</math> (mM<sup>-1</sup> s<sup>-1</sup>)</b> |
|---------------------|-----------------|---------------------------------------------------------|-------------------------------------------|------------------------------------------------------------------------------------------|
| <b>Acetaldehyde</b> | 0.5             | 34.51 ± 4.02                                            | 0.49 ± 0.10                               | 7.04 x 10 <sup>4</sup>                                                                   |
| <b>Acetaldehyde</b> | 0               | 29.01 ± 6.51                                            | 0.51 ± 0.11                               | 5.69 x 10 <sup>4</sup>                                                                   |

### Supplementary References

1. Nattermann, M. *et al.* Engineering a Highly Efficient Carborigase for Synthetic One-Carbon Metabolism. *ACS Catalysis* **11**, 5396-5404, doi:10.1021/acscatal.1c01237 (2021).
2. Holm, L., Laiho, A., Törönen, P. & Salgado, M. DALI shines a light on remote homologs: One hundred discoveries. *Protein Science* **32**, e4519, doi:<https://doi.org/10.1002/pro.4519> (2023).
3. Karplus, P. A. & Diederichs, K. Linking Crystallographic Model and Data Quality. *Science* **336**, 1030-1033, doi:10.1126/science.1218231 (2012).
4. Davis, I. W., Murray, L. W., Richardson, J. S. & Richardson, D. C. MOLPROBITY: structure validation and all-atom contact analysis for nucleic acids and their complexes. *Nucleic Acids Res* **32**, W615-619, doi:10.1093/nar/gkh39832/suppl\_2/W615 [pii] (2004).
